# Supplementary material for: Integrating 3D printing of biomaterials with nitric oxide release
Source: Royal Society of Chemistry journal article supplement (doi:10.1039/d4bm01304b), 2025-01-01

## **Integrating 3D printing of biomaterials with nitric oxide release**

Herllan V. de Almeida<sup>a</sup>, Mateus P. Bomediano<sup>a</sup>, Daniele M. Catori<sup>b</sup>, Elizaura H. C. Silva<sup>a</sup>, and Marcelo G. de Oliveira<sup>a\*</sup>

<sup>a</sup> *Institute of Chemistry, University of Campinas, UNICAMP, Campinas 13083-970, São Paulo, Brazil*

<sup>b</sup> *School of Chemical, Materials and Biomedical Engineering, College of Engineering, University of Georgia, Athens 30602 Georgia, United States*

### **Electronic Supplementary Information**

**Scheme S1** Chemical structures of the main polymers used for the 3D printing of nitric oxide releasing biomaterials cited in Table 1 of the main text

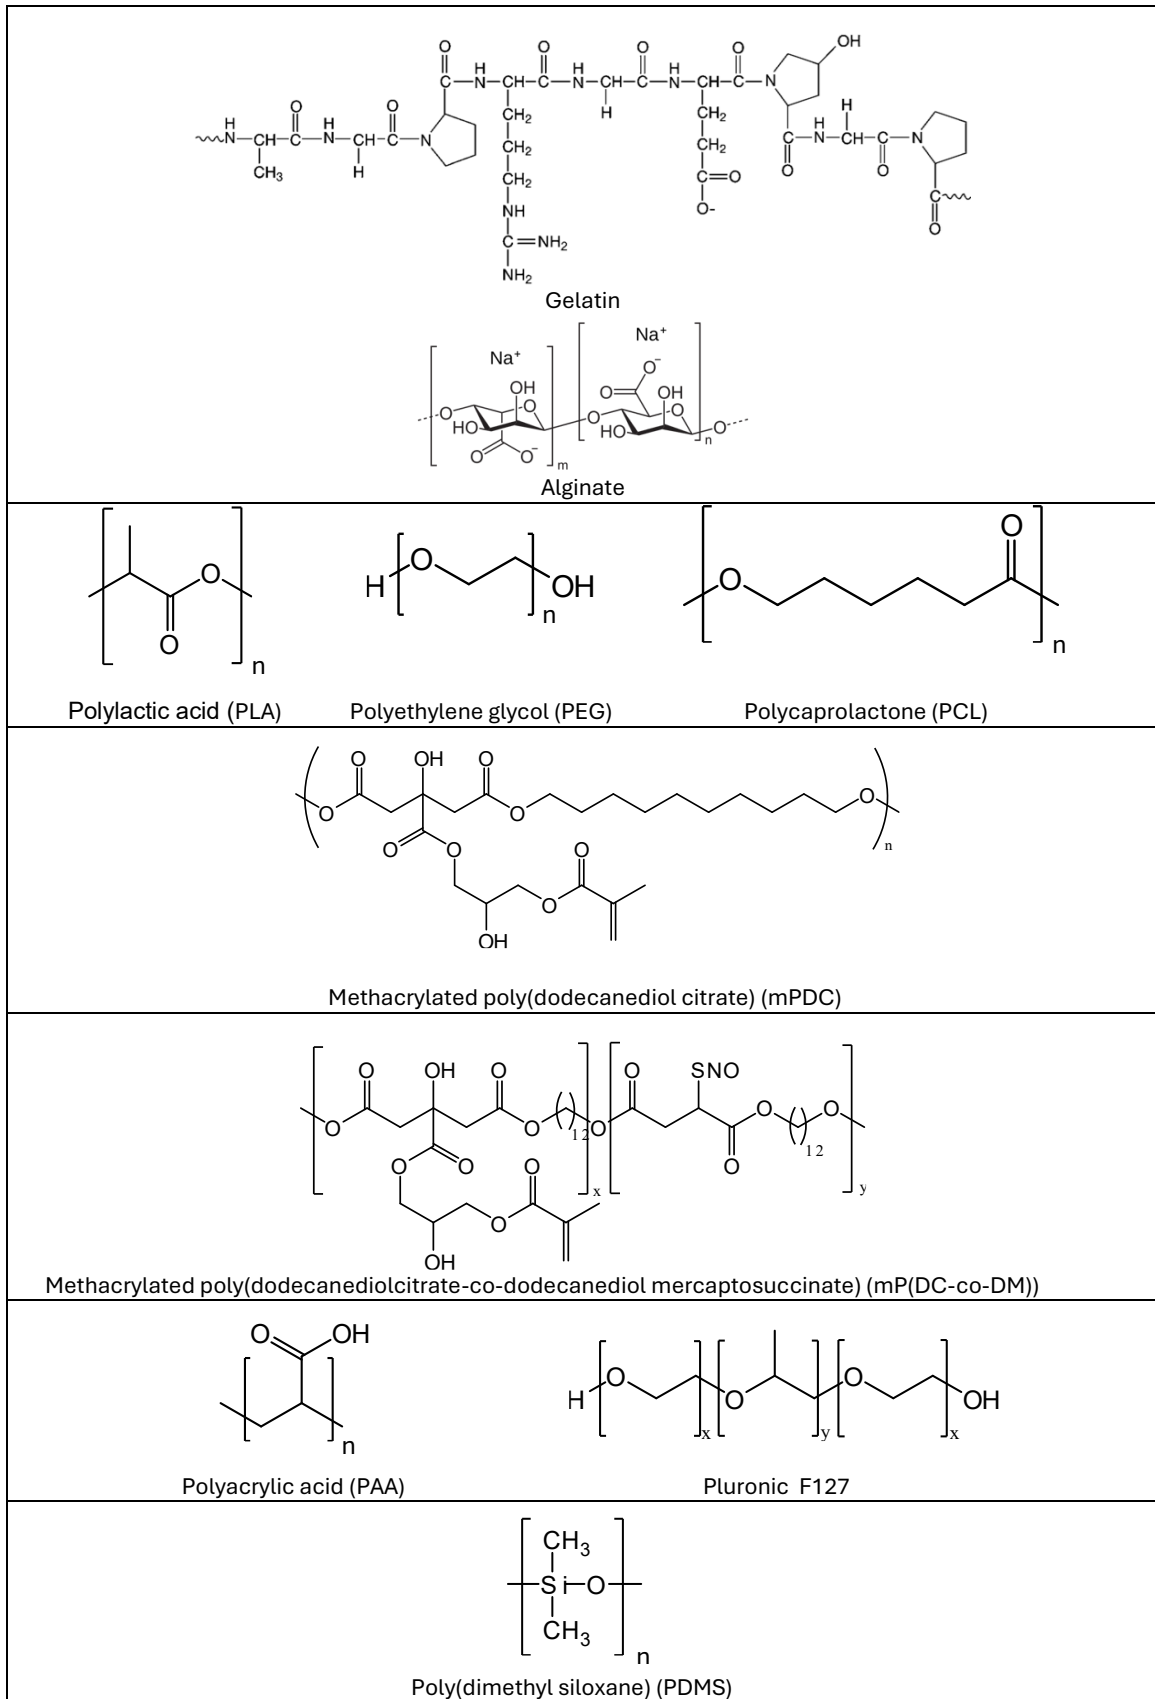

Supplement: d4bm01304b1.pdf [file d4bm01304b1.pdf]
